# Supplementary material for: Ultrasound-free preparation of graphene oxide from mechanochemically oxidized graphite
Source: Royal Society of Chemistry journal article supplement (doi:10.1039/c3ta10542c), 2013-01-01
Supplement: c3ta10542c.pdf [file c3ta10542c.pdf]

## Electronic Supplementary Information

### Ultrasound-free preparation of graphene oxide from mechanochemically oxidized graphite

Oleg Yu. Posudievsky,\* Olga A. Kozarenko, Oleksandra A. Khazieieva, Vyacheslav G. Koshechko,  
Vitaly D. Pokhodenko

L.V. Pisarzhevsky Institute of Physical Chemistry of the National Academy of Sciences Ukraine,  
31 prospekt Nauki, Kyiv 03028, Ukraine;  
E-mail: [posol@inphyschem-nas.kiev.ua](mailto:posol@inphyschem-nas.kiev.ua); Tel/Fax: +38044 525 6672

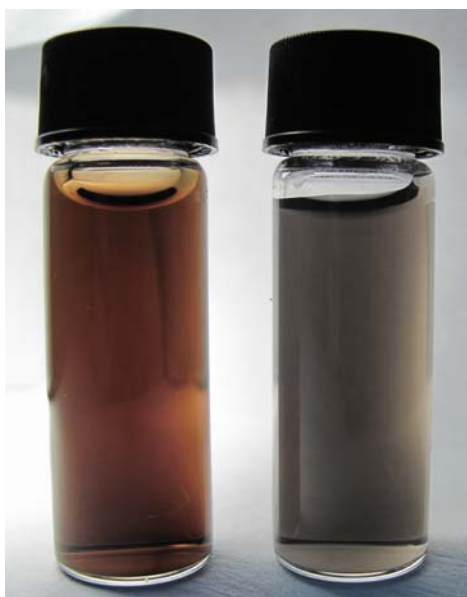

**Fig. S1** Photographs of wGO (left) and dGO (right) dispersions.

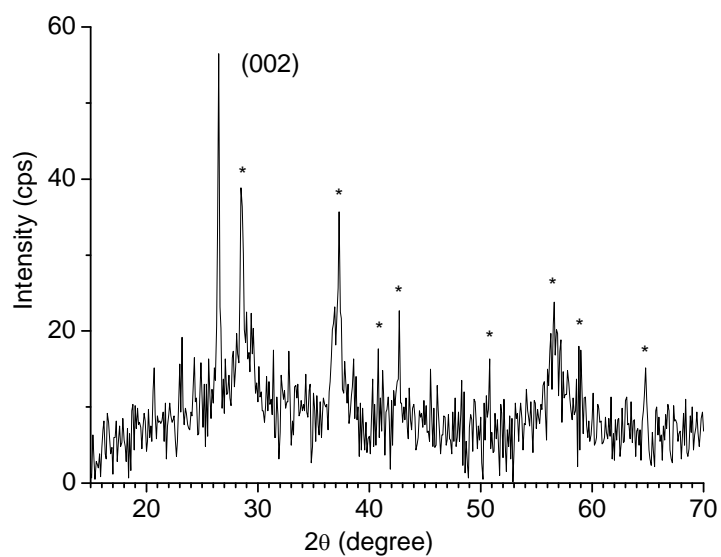

**Fig. S2** X-ray diffractogram of the graphite/MnO<sub>2</sub> mixture after its mechanochemical treatment (500 rpm during 3 hours). Asterisks denote the reflexes of MnO<sub>2</sub> (No. 020567 from PDF-2).

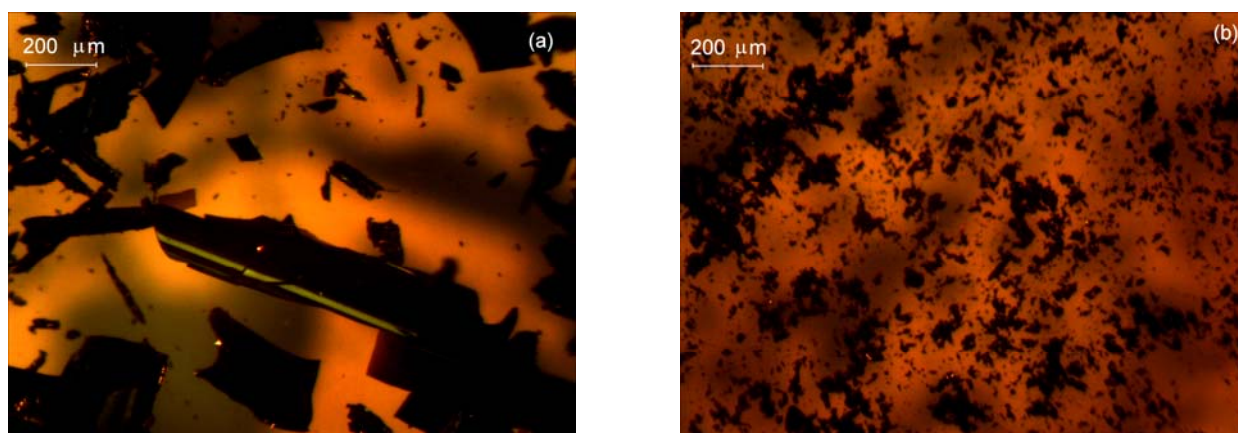

**Fig. S3** Photographs of the precursor of wGO before (a) and after (b) the thermal treatment 1000°C during 30 s.
